# Supplementary material for: Biotransformation of Protopanaxadiol-Type Ginsenosides in Korean Ginseng Extract into Food-Available Compound K by an Extracellular Enzyme from Aspergillus niger
Source: PubMed Central journal article supplement (PMC9728230; doi:10.4014/jmb.2007.07003), 2020-07-31
Supplement: JMB-30-10-1560-supple.pdf [file JMB-30-10-1560-supple.pdf]

## Supporting information

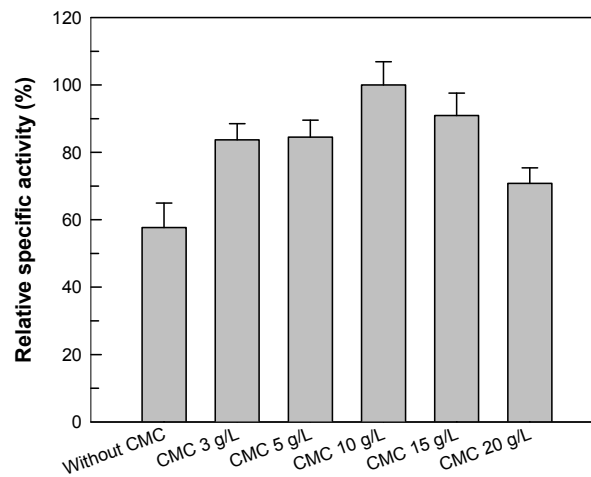

**Fig. S1.** Effect of the concentration of carboxymethyl cellulose added during cultivation on the hydrolytic activity for ginsenoside Rb2. The reactions were performed at 50°C for 6 h in 0.2 M citrate-phosphate buffer (pH 5.5) containing 0.4 mg/mL ginsenoside Rb2 and 1.0 mg/mL extracellular enzyme. Data are expressed as the means of three experiments and the error bars represent standard deviations.

**A**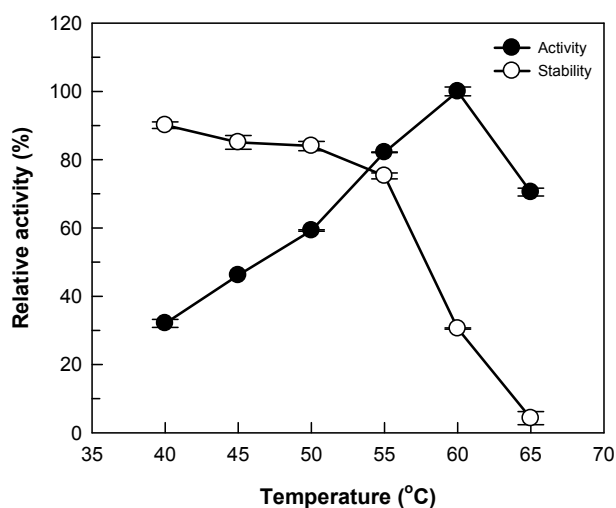**B**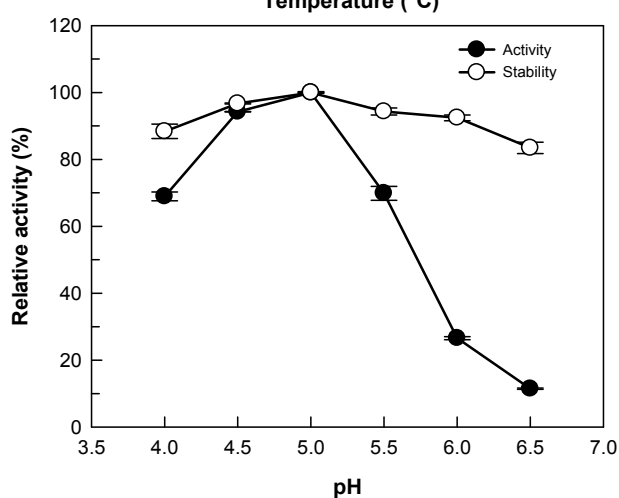

**Fig. S2.** Effects of temperature and pH on the activity and stability of extracellular enzyme from *Aspergillus niger* for ginsenoside Rb1. (A) Temperature effect. The reactions were performed for 10 min in 0.2 M citrate-phosphate buffer (pH 5.0) containing 0.4 mg/mL ginsenoside Rb1 and 1.0 mg/mL extracellular enzyme by varying the temperature from 40 to 65°C. (B) pH effect. The reactions were performed at 55°C for 10 min in 0.2 M citrate-phosphate buffer containing 0.4 mg/mL ginsenoside Rb1 and 1.0 mg/mL extracellular enzyme by varying the pH 4.0 to 6.5. The reactions of temperature and pH stability of the extracellular enzyme were determined by measuring the residual activity at 55°C and pH 5.0 after incubating the extracellular enzyme for 24 h. Data are expressed as the means of three experiments and the error bars represent standard deviations.

**A**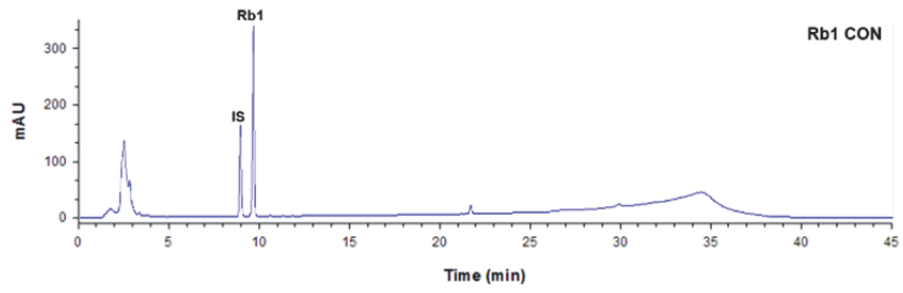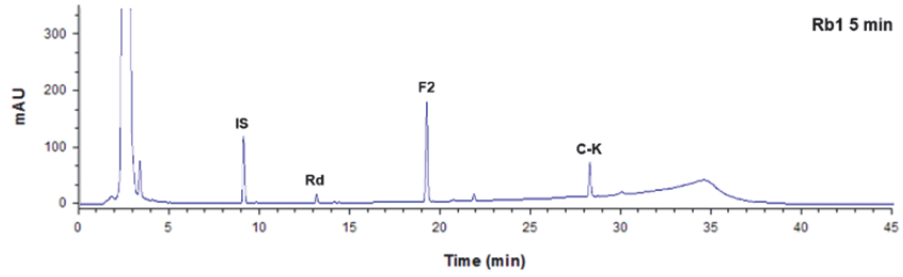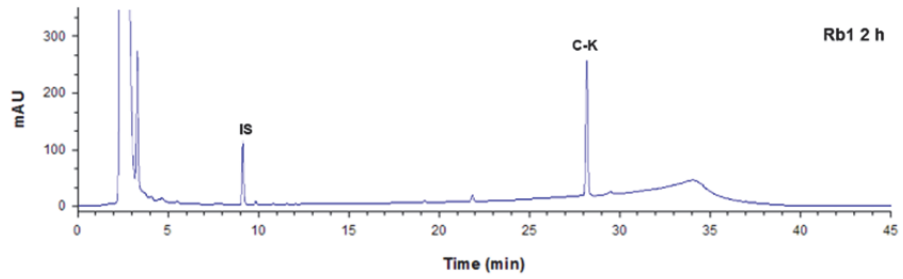**B**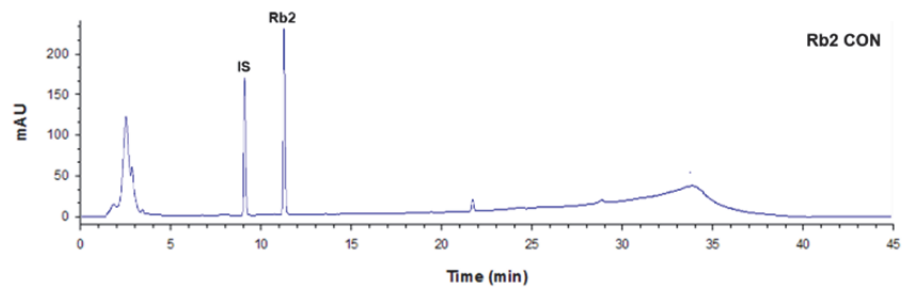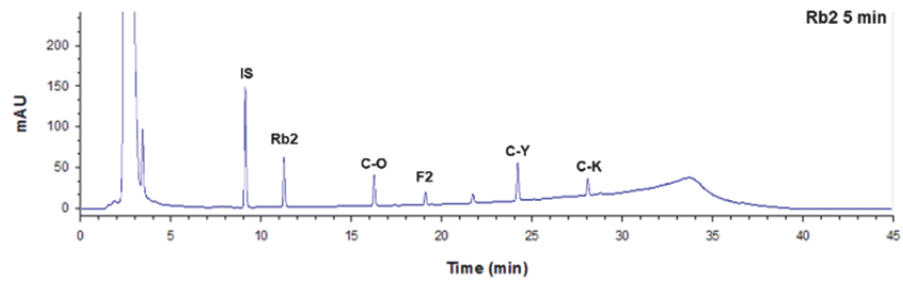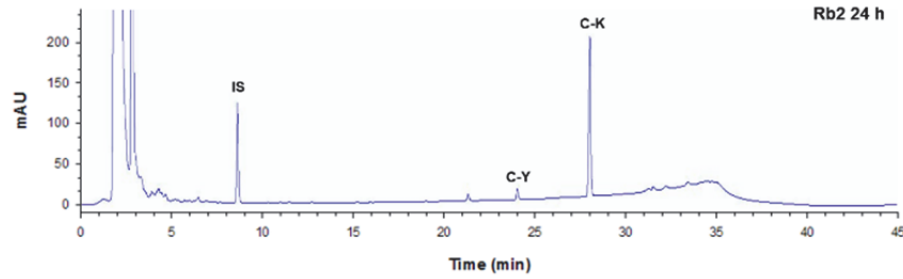

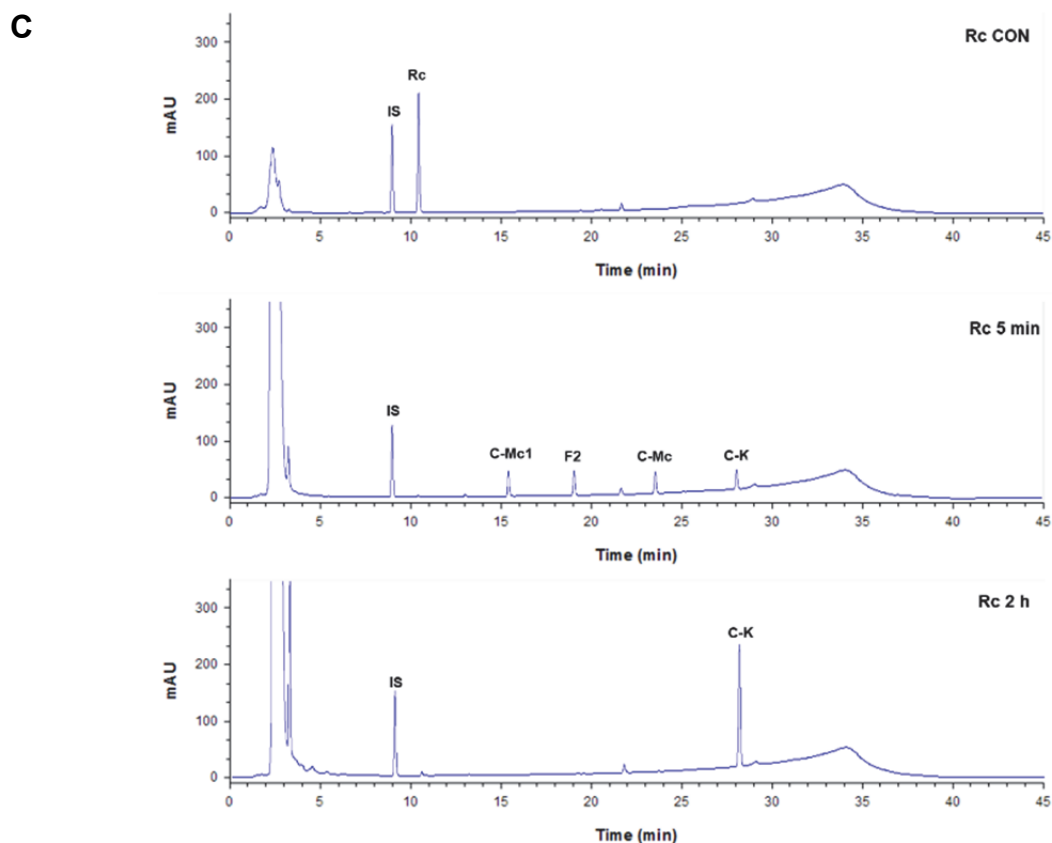

**Fig. S3.** High-performance liquid chromatography profiles during the conversion of ginsenosides Rb1, Rb2, and Rc into compound K by extracellular enzyme from *Aspergillus niger*. (A) Conversion of Rb1 to compound K (C-K). (B) Conversion of Rb2 to C-K. (C) Conversion of Rc to C-K. The reactions were performed at 55°C for 5 min and 2 h or 24 h in 0.2 M citrate-phosphate buffer (pH 5.0) containing 1.0 mg/mL of each ginsenoside and 2.5 mg/mL extracellular enzyme. Control (CON) indicated high-performance liquid chromatography profile of substrate at initial time.

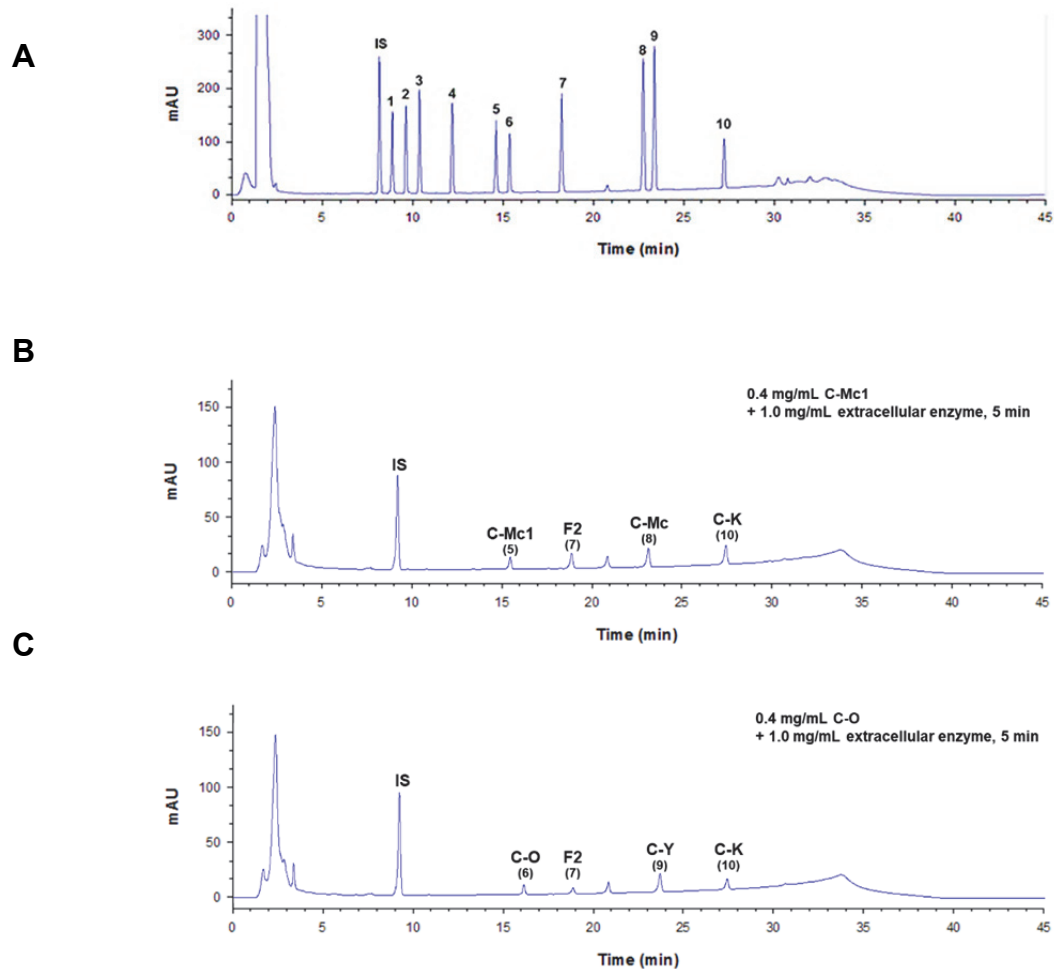

**Fig. S4.** High-performance liquid chromatography profiles for the conversion of compound O and compound Mc1 into compound K by extracellular enzyme from *Aspergillus niger* for 5 min with PPD-type ginsenoside standards. (A) High-performance liquid chromatography (HPLC) profile for ginsenoside standards. (B) HPLC profile for reaction products of compound Mc1 (C-Mc1). (C) HPLC profile for reaction products of compound O (C-O). The reactions were performed at 55°C for 5 min in 0.2 M citrate-phosphate buffer (pH 5.0) containing 0.4 mg/mL of C-Mc1 or C-O and 1.0 mg/mL extracellular enzyme. Internal standard (IS, digoxin); 1, Rb1; 2, Rc; 3, Rb2; 4, Rd; 5, C-Mc1; 6, C-O; 7, F2; 8, compound Mc (C-Mc); 9, compound Y (C-Y); and 10, compound K (C-K).

**A**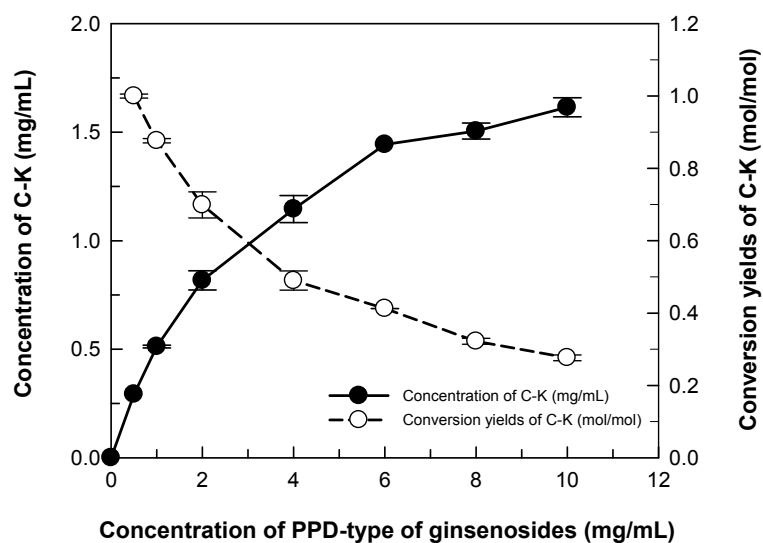**B**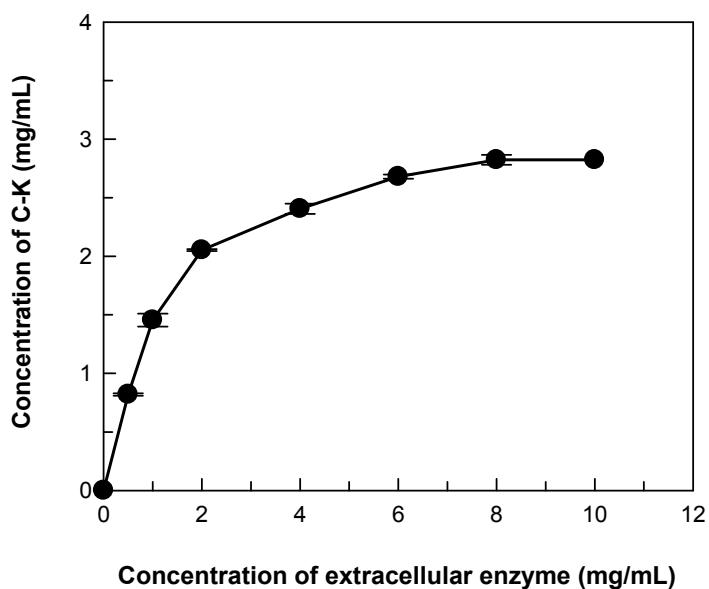

**Fig. S5.** Effects of the concentrations of (A) protopanaxadiol-type ginsenoside mixture from Korean ginseng (PPDKG) and (B) extracellular enzyme from *Aspergillus niger* on compound K production. (A) The reactions were performed at 55°C for 12 h in 0.2 M citrate-phosphate buffer (pH 5.0) containing 1.0 mg/mL extracellular enzyme by varying the concentration of PPDKG from 0.5 mg/mL to 10.0 mg/mL. (B) The reactions were performed at 55°C for 12 h

in 0.2 M citrate-phosphate buffer (pH 5.0) containing 6.0 mg/mL PPDKG by varying the concentration of extracellular enzyme from 0.5 mg/mL to 10.0 mg/mL. ●, Concentration of produced compound K (mg/mL); ○, Conversion yields of produced compound K (mol/mol). Data are expressed as the means of three experiments and the error bars represent standard deviations.

**Table S1. Relative activity of extracellular enzymes from *A. niger* for aryl-glycosides.**

| <b>Substrate<sup>1</sup></b>                             | <b>Specific activity</b><br>( $\mu\text{mol}/\text{min}/\text{mg}$ ) | <b>Relative activity</b><br>(%) |
|----------------------------------------------------------|----------------------------------------------------------------------|---------------------------------|
| <i>o</i> NP <sup>2</sup> - $\beta$ -D-glucopyranoside    | 0.5 $\pm$ 0.00                                                       | 5.6 $\pm$ 0.03                  |
| <i>o</i> NP- $\beta$ -D-xylopyranoside                   | 4.2 $\pm$ 0.01                                                       | 51.6 $\pm$ 0.14                 |
| <i>p</i> NP <sup>3</sup> - $\alpha$ -D-galactopyranoside | 14.8 $\pm$ 0.33                                                      | 181 $\pm$ 4.05                  |
| <i>p</i> NP- $\beta$ -D-galactopyranoside                | 3.8 $\pm$ 0.04                                                       | 46.4 $\pm$ 0.43                 |
| <i>p</i> NP- $\alpha$ -D-glucopyranoside                 | 1.0 $\pm$ 0.00                                                       | 12.0 $\pm$ 0.00                 |
| <i>p</i> NP- $\beta$ -D-glucopyranoside                  | 8.2 $\pm$ 0.07                                                       | 100 $\pm$ 0.87                  |
| <i>p</i> NP- $\alpha$ -L-arabinofuranoside               | 18.9 $\pm$ 0.12                                                      | 230 $\pm$ 1.45                  |
| <i>p</i> NP- $\alpha$ -L-arabinopyranoside               | 0.11 $\pm$ 0.00                                                      | 1.3 $\pm$ 0.00                  |
| <i>p</i> NP- $\beta$ -D-xylopyranoside                   | 4.1 $\pm$ 0.01                                                       | 50.4 $\pm$ 0.14                 |
| <i>p</i> NP- $\beta$ -D-rhamnopyranoside                 | 0.10 $\pm$ 0.01                                                      | 1.3 $\pm$ 0.06                  |

<sup>1</sup>Substrate concentration: 1 mM.

<sup>2</sup>*o*NP: *o*-nitrophenol

<sup>3</sup>*p*NP: *p*-nitrophenol
